# Supplementary material for: Rapid relaxation of pandemic restrictions after vaccine rollout favors growth of SARS-CoV-2 variants: A model-based analysis
Source: PubMed Central journal article supplement (PMC8612578; doi:10.1371/journal.pone.0258997), 2021-11-24
Supplement: pone.0258997.s001.pdf [file pone.0258997.s001.pdf]

## S1 Table. Parameter values for transmissibility and cross immunity for SARS-CoV-2 variants.

| Variant | Transmissibility relative to WT | Cross immunity with WT | % of US infections as of 4/10/21 |
|---------|---------------------------------|------------------------|----------------------------------|
| Alpha   | 1.59 [1]                        | 89.5% [2]              | 59.6%                            |
| Beta    | 1.5 [3]                         | 75.0% [2]              | 1.0%                             |
| Gamma   | 2.0 [4]                         | 68.0% [4]              | 3.7%                             |

Transmissibility and cross immunity estimates were taken directly from the references cited in the table. All variant frequency data was taken from the CDC COVID Data Tracker [5].

### References for S1 Table

- [1] Davies NG, Abbott S, Barnard RC, Jarvis CI, Kucharski AJ, Munday JD, et al. Estimated transmissibility and impact of SARS-CoV-2 lineage B.1.1.7 in England. *Science*. 2021;doi:10.1126/science.abg3055.
- [2] Abu-Raddad LJ, Chemaitelly H, Butt AA. Effectiveness of the BNT162b2 Covid-19 Vaccine against the B.1.1.7 and B.1.351 Variants. *New England Journal of Medicine*. 2021;0(0):null. doi:10.1056/NEJMc2104974.
- [3] Pearson CAB, Russell TW, Davies N, Kucharski AJ, working group CC, Edmunds WJ, et al. Estimates of severity and transmissibility of novel SARS-CoV-2 variant 501Y.V2 in South Africa; 2021. Available from: <https://cmmid.github.io/topics/covid19/sa-novel-variant.html>.
- [4] Faria NR, Mellan TA, Whittaker C, Claro IM, Candido DdS, Mishra S, et al. Genomics and epidemiology of the P.1 SARS-CoV-2 lineage in Manaus, Brazil. *Science*. 2021;doi:10.1126/science.abh2644.
- [5] CDC. COVID Data Tracker;. Available from: <https://covid.cdc.gov/covid-data-tracker>.
