# Supplementary material for: Rapid relaxation of pandemic restrictions after vaccine rollout favors growth of SARS-CoV-2 variants: A model-based analysis
Source: PubMed Central journal article supplement (PMC8612578; doi:10.1371/journal.pone.0258997), 2021-11-24
Supplement: pone.0258997.s002.pdf [file pone.0258997.s002.pdf]

**S2 Table. Other parameter values used to simulate SARS-CoV-2 spread.**

| Parameter                                                 | Value       | Reference                                                                                 |
|-----------------------------------------------------------|-------------|-------------------------------------------------------------------------------------------|
| Initial fraction of population vaccinated                 | 50%         | [1]                                                                                       |
| Daily vaccine uptake rate (% susceptibles vaccinated/day) | 1%          | [1] (upper bound)                                                                         |
| Initial fraction of population previously infected        | 30%         | [2]                                                                                       |
| Initial fraction of population currently infected         | 0.13%       | $\frac{\text{(current case count)(mean infection duration)}}{\text{total US population}}$ |
| Mean infection duration                                   | 10 days     | [3]                                                                                       |
| Mean duration of immunity                                 | 18 months   | [4] (upper bound)                                                                         |
| $R_0$ of WT SARS-CoV-2                                    | 3.32        | [5]                                                                                       |
| Total population size                                     | 300 million | approximate size of US population                                                         |

**References for S2 Table**

- [1] U.S. COVID-19 vaccine tracker: See your state’s progress;. Available from: <https://www.mayoclinic.org/coronavirus-covid-19/vaccine-tracker>.
- [2] CDC. Cases, Data, and Surveillance; 2020. Available from: <https://www.cdc.gov/coronavirus/2019-ncov/cases-updates/burden.html>.
- [3] Rocklöv J, Sjödin H, Wilder-Smith A. COVID-19 outbreak on the Diamond Princess cruise ship: estimating the epidemic potential and effectiveness of public health countermeasures. *J Travel Med.* 2020;27(3). doi:10.1093/jtm/taaa030.
- [4] Isho B, Abe KT, Zuo M, Jamal AJ, Rathod B, Wang JH, et al. Persistence of serum and saliva antibody responses to SARS-CoV-2 spike antigens in COVID-19 patients. *Science Immunology.* 2020;5(52). doi:10.1126/sciimmunol.abe5511.
- [5] Alimohamadi Y, Taghdir M, Sepandi M. Estimate of the Basic Reproduction Number for COVID-19: A Systematic Review and Meta-analysis. *J Prev Med Public Health.* 2020;53(3):151–157. doi:10.3961/jpmph.20.076.
